# Supplementary material for: Differential Changes in ACPA Fine Specificity and Gene Expression in a Randomized Trial of Abatacept and Adalimumab in Rheumatoid Arthritis
Source: PubMed Central journal article supplement — Rheumatol Ther. 2021 Dec 8;9(2):391–409. doi: 10.1007/s40744-021-00404-x (PMC8964842; doi:10.1007/s40744-021-00404-x), 2021-12-08
Supplement: 40744_2021_404_MOESM1_ESM.pdf [file 40744_2021_404_MOESM1_ESM.pdf]

## **SUPPLEMENTARY MATERIAL**

### **Differential Changes in ACPA Fine Specificity and Gene Expression in a Randomized Trial of Abatacept and Adalimumab in Rheumatoid Arthritis**

Omar Jabado • Michael A. Maldonado • Michael Schiff • Michael E. Weinblatt • Roy Fleischmann • William H. Robinson • Aiqing He • Vishal Patel • Alex Greenfield • Jasmine Saini • David Galbraith • Sean E. Connolly

O. Jabado\* • M. A. Maldonado • A. He • V. Patel\* • A. Greenfield\* • J. Saini • D. Galbraith • S. E. Connolly

Bristol Myers Squibb, Princeton, New Jersey, United States

\*At the time the study was conducted

M. Schiff

University of Colorado, Denver, Colorado, United States

M. E. Weinblatt

Brigham and Women's Hospital, Boston, Massachusetts, United States

R. Fleischmann

Metroplex Clinical Research Center and University of Texas Southwestern Medical Center, Dallas, Texas, United States

W. H. Robinson

Stanford University School of Medicine, Stanford, California, United States

**Corresponding author:**

Sean E. Connolly, PhD

Bristol Myers Squibb

Email: [sean.connolly@bms.com](mailto:sean.connolly@bms.com)

**Text**

Details of the batch correction steps and programming code for each analysis can be obtained from the authors upon request.

**Table S1.** Peptide sequences of ACPAs

| Full name                                   | Short name           | Peptide sequence (N-COOH)                           |
|---------------------------------------------|----------------------|-----------------------------------------------------|
| Fibrinogen A 616–635 cit3 small cyclic (75) | Fibrinogen A 616–635 | Biotin-Ahx-THSTK[CIT]CHAKS[CIT]PV[CIT]GIHTSC-CONH2  |
| Clusterin 231–250 cit sm-1 cyclic (94)      | Clusterin 231–250    | Biotin-Ahx-CHFS[Cit]ASSCIDELFQD[Cit]FFT[Cit]-CONH2  |
| Filaggrin 48–65 cit2 v1 cyclic (79)         | Filaggrin 48–65      | Biotin-Ahx-CTIHAHPGS[CIT][CIT]GGRHGYHHC-CONH2       |
| Fibrinogen A 556–575 cit sm cyclic (81)     | Fibrinogen A 556–575 | Biotin-Ahx-NTKESSSHHPGCAEFPS[CIT]GKC-CONH2          |
| Vimentin 58–77 cit3 cyclic small-1 (77)     | Vimentin 58–77       | Biotin-Ahx-GGCVYAT[CIT]SSACV[CIT]L[CIT]SSVPGV-CONH2 |
| H2A/a 1–20 cit sm-2 cyclic (71)             | H2A/a 1–20           | Biotin-Ahx-MSG[Cit]GKQGCKA[Cit]AKAKT[Cit]SSC-CONH2  |
| Enolase-1A 5–21 cit (73)                    | Enolase-1A 5–21      | Biotin-CKIHA[CIT]EIFDS[CIT]GNPTVEC                  |
| Biglycan 247–266 cit sm-1 cyclic (58)       | Biglycan 247–266     | Biotin-Ahx-CEDLL[Cit]YSKLY[Cit]LGCGHNQI[Cit]-CONH2  |
| Clusterin 221–240 cit cyclic (52)           | Clusterin 221–240    | Biotin-Ahx-CQTHMLDVMQDHFS[Cit]ASSIIDC-CONH2         |
| Fibrinogen B 246–267 cit (17)               | Fibrinogen B 246–267 | Biotin-[Cit]KGGGETSEMYLIQPDSSVKPY[Cit]Y             |

|                                              |                      |                                                 |
|----------------------------------------------|----------------------|-------------------------------------------------|
| Apolipo E 277–296 cit2 sm2<br>cyclic (96)    | Apolipo E 277–296    | Biotin-Ahx-A[CIT]LKSWFECPLVEDMQ[CIT]QWAGC-CONH2 |
| H2B/a 62–81 cit cyclic (32)                  | H2B/a 62–81          | Biotin-Ahx-IMNSFVNDCIFE[Cit]IAGEAS[Cit]LC-CONH2 |
| Fibrinogen A 211–230 cit small<br>cyclic (6) | Fibrinogen A 211–230 | Biotin-Ahx-CDLLPS[CIT]D[CIT]QHLPCIKMKPVP-CONH2  |
| Fibrinogen A 582–599 cit (50)                | Fibrinogen A 582–599 | Biotin-QFTSSTSYN[Cit]GDSTFESK                   |

ACPAs not included in this table: CCP (8), vimentin (recombinant) CIT (21), histones 2A cit (54), histones 2B CIT (36), fibrinogen CIT (19), apolipoprotein E CIT (56). *ACPA* anti-citrullinated protein antibody, *CCP* cyclic citrullinated peptide.

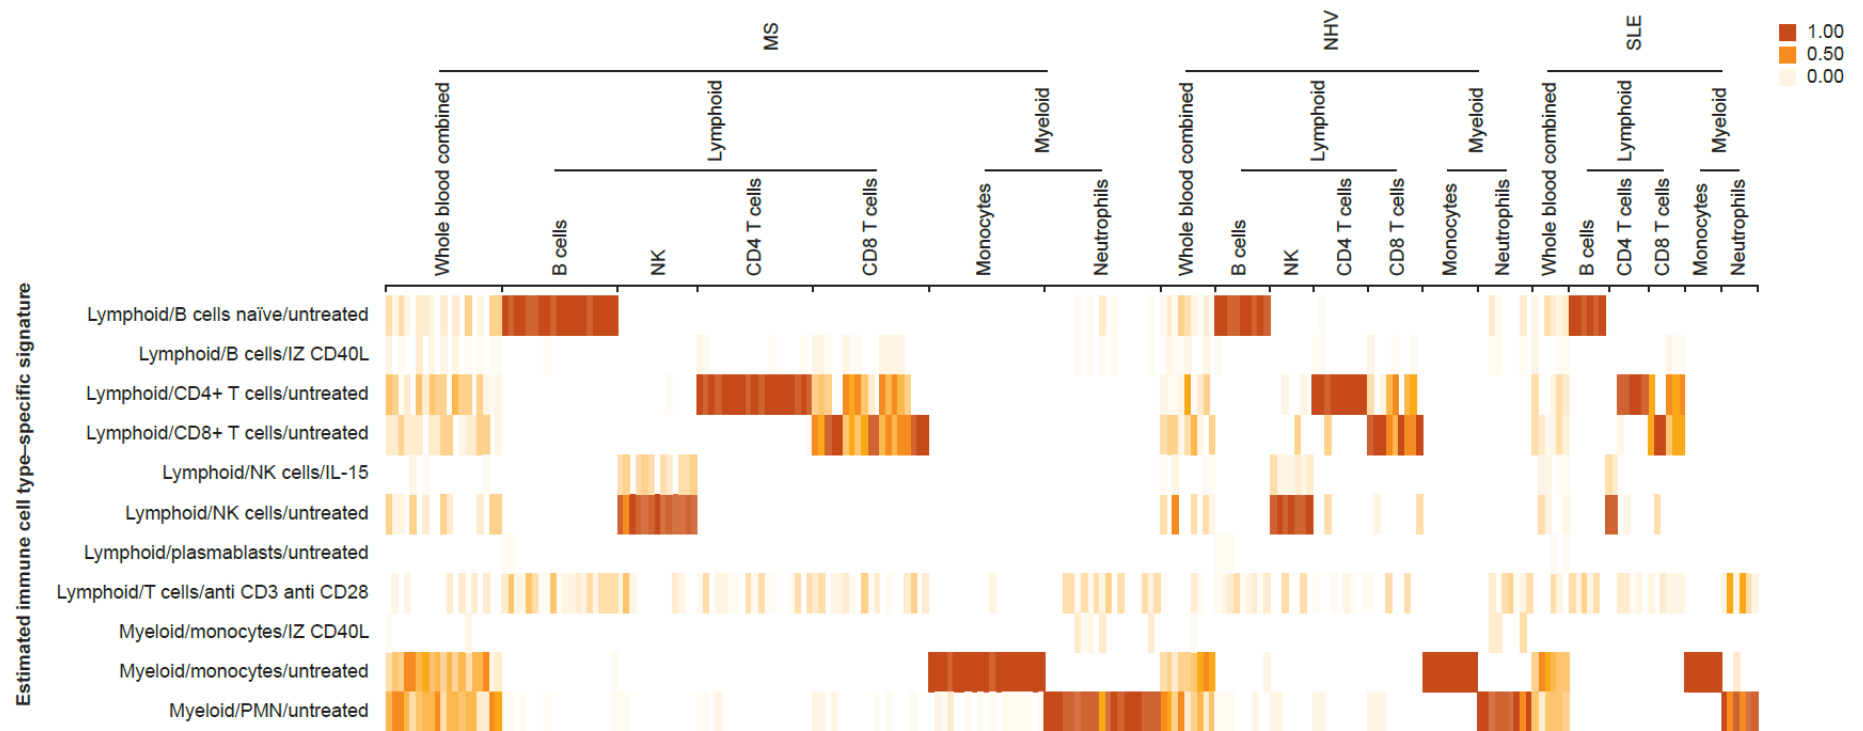

**Fig. S1** Validation of immune cell type-specific gene signatures using a separate cohort from the Benaroya Research Institute at Virginia Mason. Each column represents a sample from an individual patient. *IL* interleukin, *IZ* isoleucine zipper, *MS* multiple sclerosis, *NHV* normal healthy volunteers, *NK* natural killer, *PMN* polymorphonuclear, *SLE* systemic lupus erythematosus.

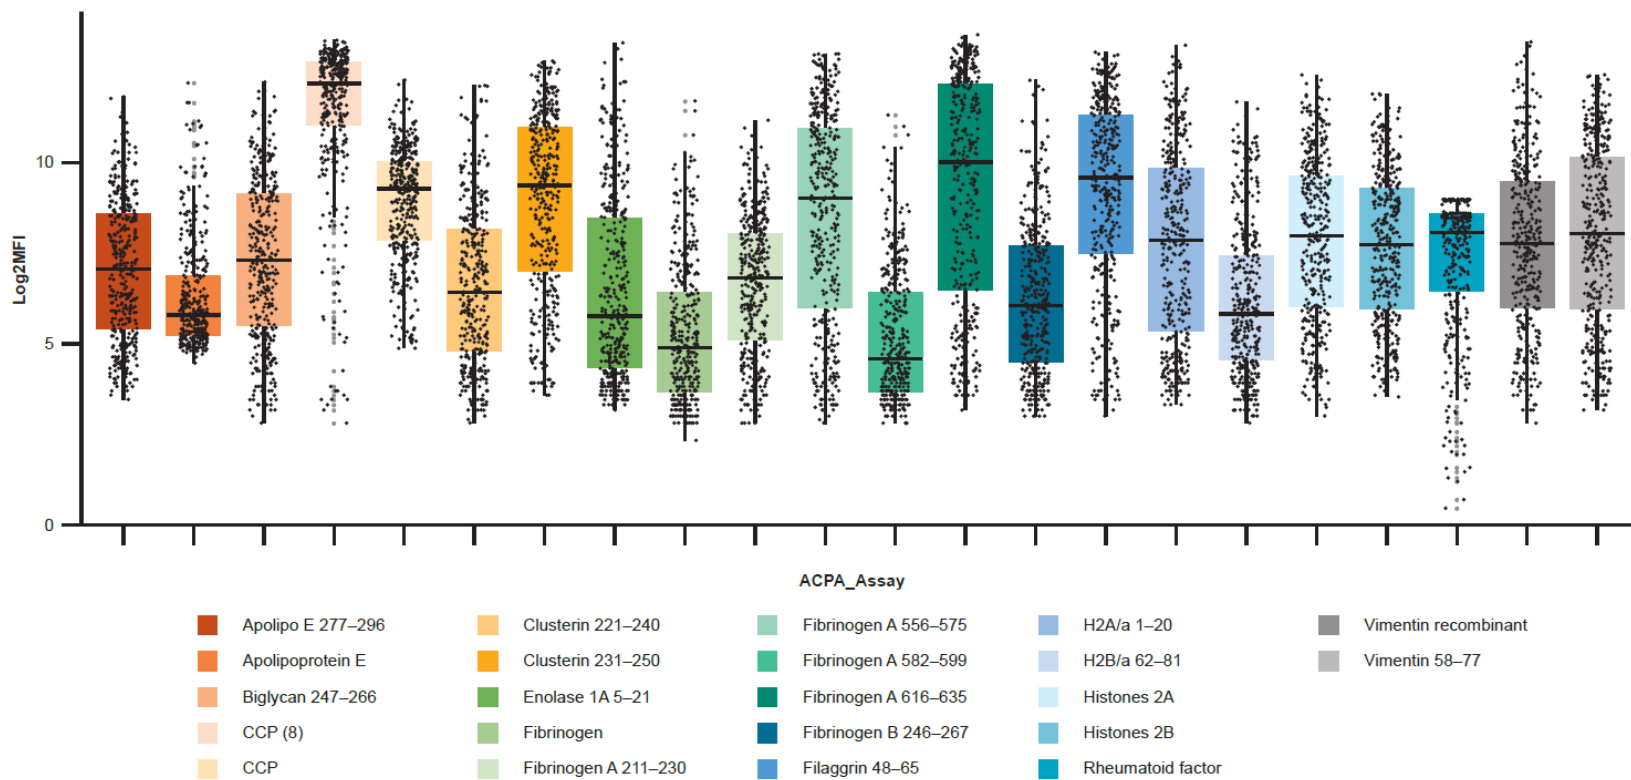

**Fig. S2** Fluorescent signals of ACPAs at baseline. Lines denote medians, boxes denote lower to upper quartiles, vertical lines denote the lower to upper range. *ACPA* anti-citrullinated protein antibody, *CCP* cyclic citrullinated peptide.

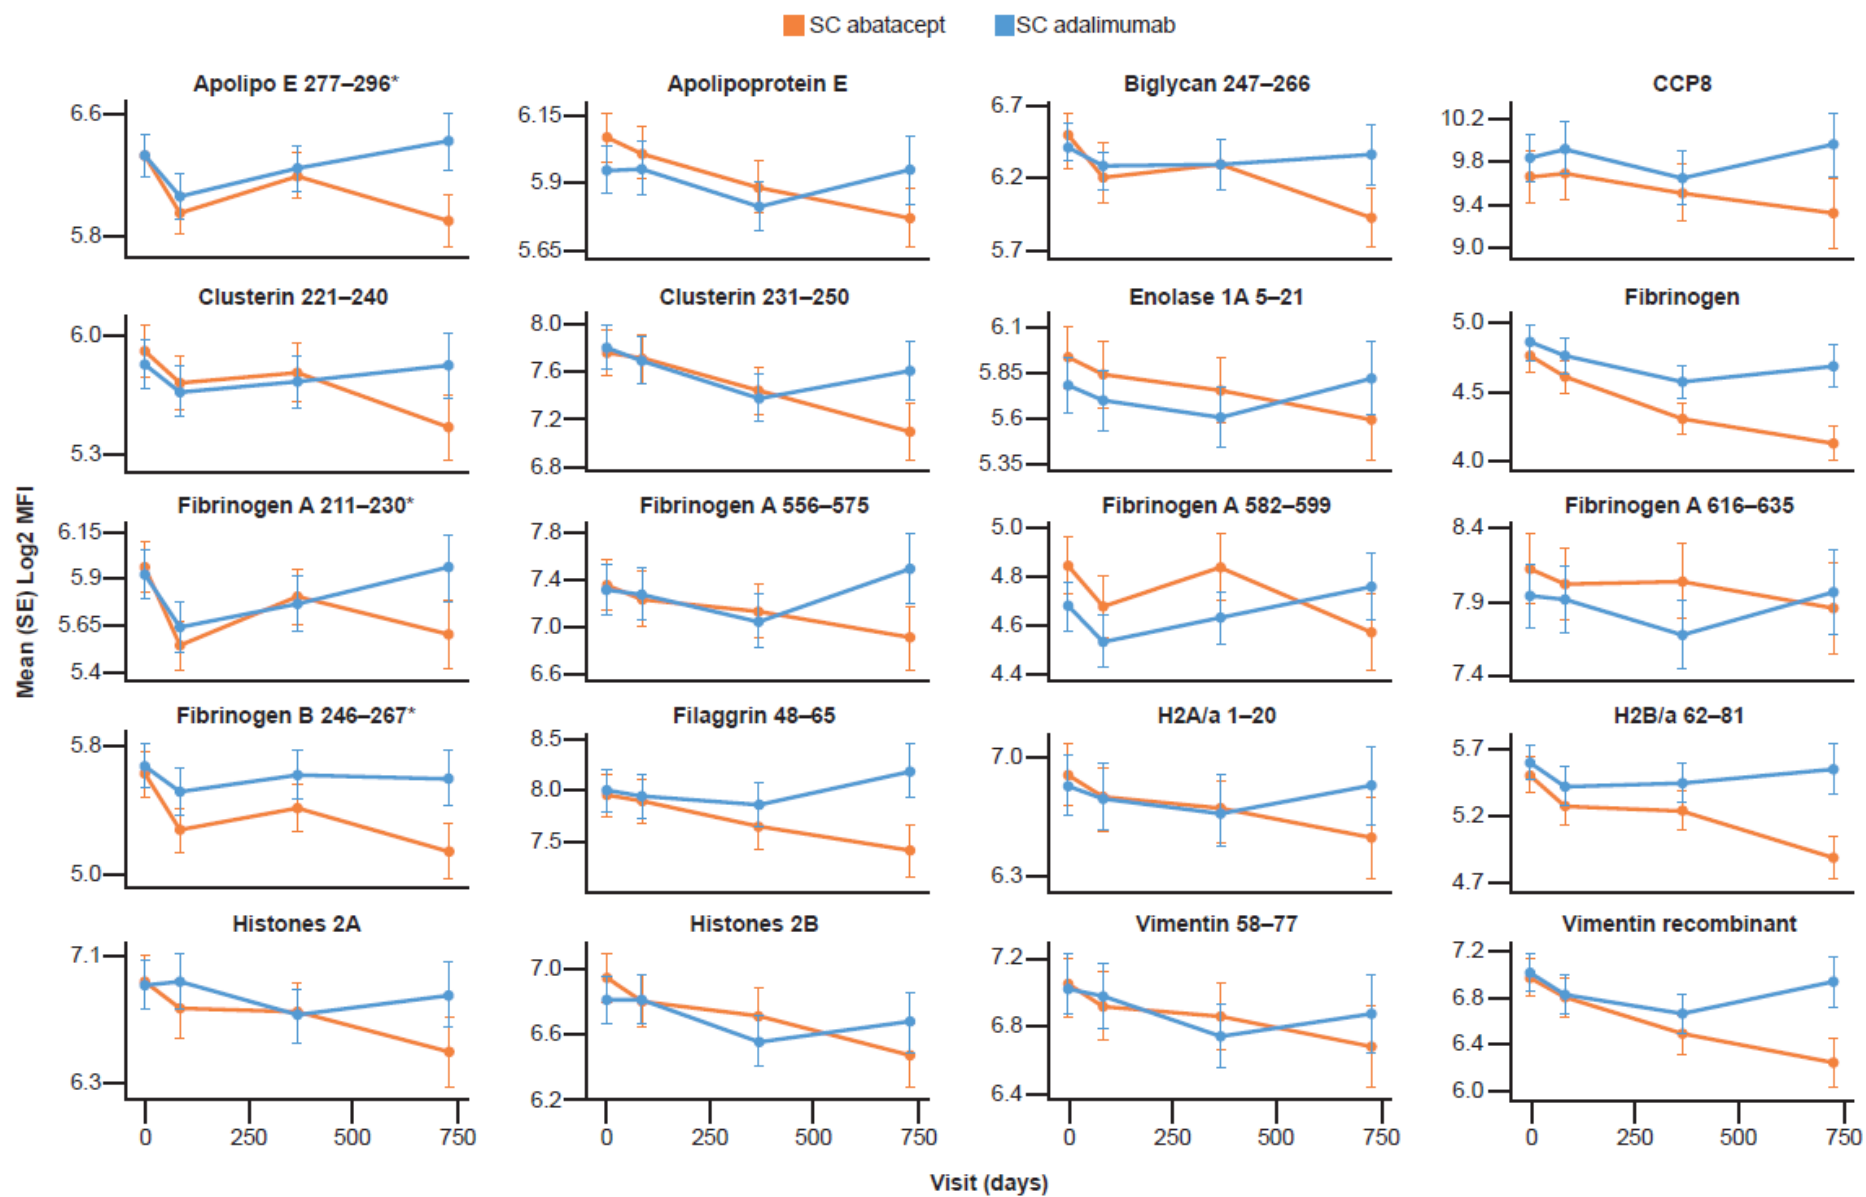



**Fig. S3** Profiles of selected ACPAs from baseline to Year 2, by treatment group.

\*Profiles which were significantly different ( $p < 0.05$ ; linear regression model) between treatments at Year 2.

*ACPA* anti-citrullinated protein antibody, *CCP* cyclic citrullinated peptide, *MFI* mean fluorescence intensity, *SC* subcutaneous, *SE* standard error.
